# Supplementary material for: Hydrocoel morphogenesis forming the pentaradial body plan in a sea cucumber, Apostichopus japonicus
Source: PubMed Central journal article supplement (PMC9001670; doi:10.1038/s41598-022-09691-y), 2022-04-11
Supplement: 41598_2022_9691_MOESM1_ESM.pdf [file 41598_2022_9691_MOESM1_ESM.pdf]

Supplementary Figure

Hydrocoel morphogenesis forming the  
pentaradial body plan in a sea cucumber,  
*Apostichopus japonicus*

Sumio Udagawa, Takafumi Ikeda, Kohei Oguchi, Hisanori  
Kohtsuka and Toru Miura

# Supplementary figure 1

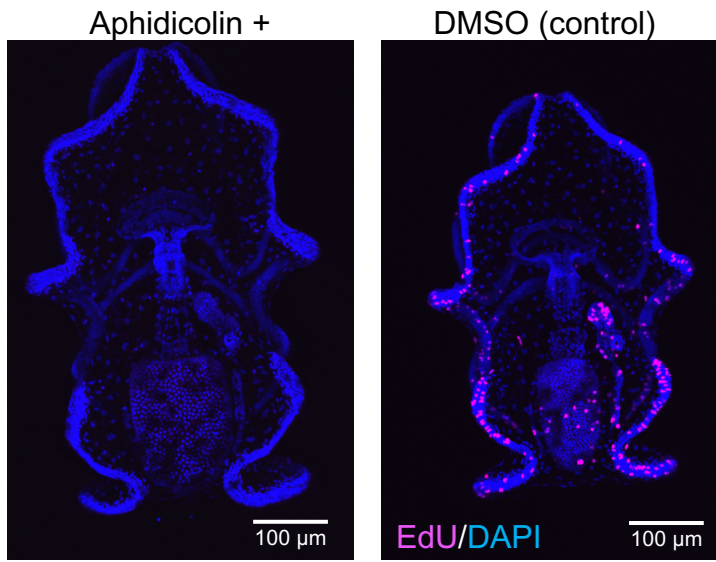

## **Supplementary Figure 1 EdU detection in aphidicolin-treated specimens.**

Cell proliferation was detected using EdU after a 3-hour treatment with aphidicolin. In larvae incubated with EdU and 0.5 % DMSO (control), EdU signal was detected in the whole body. On the other hand, EdU signal was not detected in larvae incubated with EdU and aphidicolin.
